# Supplementary material for: Durvalumab After Chemoradiotherapy in Patients With Unresectable Stage III Non–Small Cell Lung Cancer
Source: PubMed Central journal article supplement — JAMA Netw Open. 2024 Apr 22;7(4):e247542. doi: 10.1001/jamanetworkopen.2024.7542 (PMC11036139; doi:10.1001/jamanetworkopen.2024.7542), 2024-04-22
Supplement: jamanetwopen-e247542-s002.pdf [file jamanetwopen-e247542-s002.pdf]

## Data Sharing Statement

Mooradian. Durvalumab After Chemoradiotherapy in Patients With Unresectable Stage III Non–Small Cell Lung Cancer. *JAMA Netw Open*. Published April 22, 2024.  
doi:10.1001/jamanetworkopen.2024.7542

### Data

**Data available:** Yes

**Data types:** Deidentified participant data

**How to access data:** The data underlying the findings of this study were originated by Flatiron Health, Inc. These deidentified data may be made available upon request and are subject to a license agreement with Flatiron Health; interested researchers should contact [DataAccess@flatiron.com](mailto:DataAccess@flatiron.com) to determine licensing terms. Requests to access the datasets should be directed to Flatiron Health [DataAccess@flatiron.com](mailto:DataAccess@flatiron.com).

**When available:** With publication

### Supporting Documents

**Document types:** None

### Additional Information

**Who can access the data:** Interested researchers (i.e. anyone requesting the data)

**Types of analyses:** To be determined and subject to a license agreement with Flatiron Health

**Mechanisms of data availability:** Without investigator support and subject to a license agreement with Flatiron Health
